# Supplementary material
Source: PubMed Central journal article supplement (PMC7489496)
Supplement: NIHMS1582581-supplement-1.pdf [file NIHMS1582581-supplement-1.pdf]

## Supplementary Figure 1

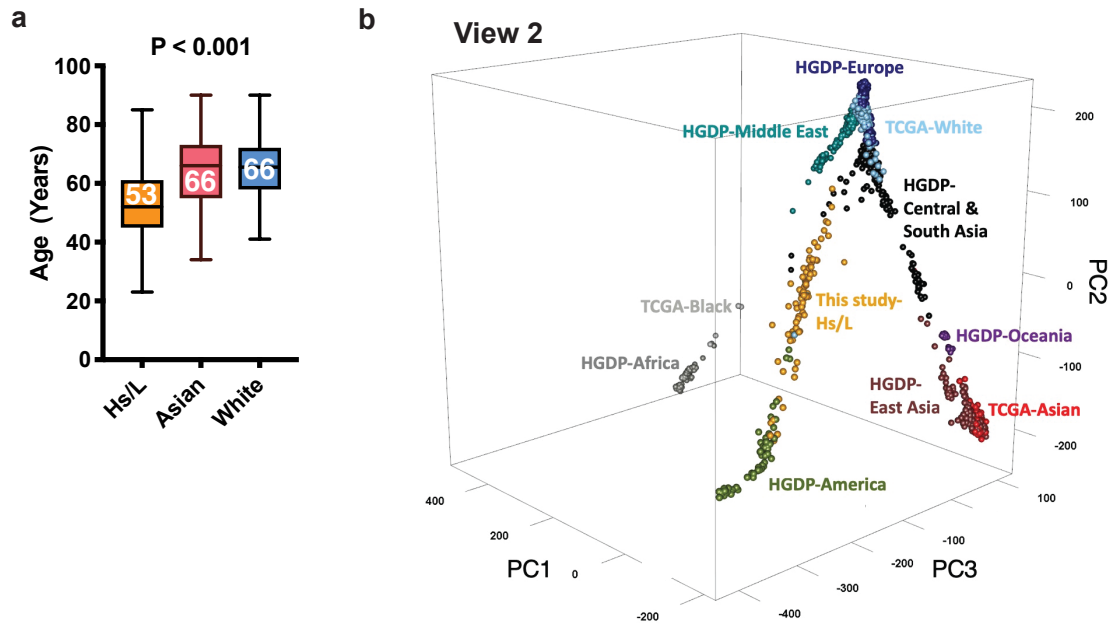

## Supplementary Figure 1

a. Age at the time of diagnosis of Hispanic/Latino (Hs/L) patients from this study, and of Asian and White patients analyzed by The Cancer Genome Atlas (TCGA). Horizontal lines, medians; boxes, interquartile ranges; whiskers, maximum and minimum values.  $P < 0.001$ .

b. Second view of the principal component analysis of whole-exome sequencing data, as analyzed by Locating Ancestry from SEquence Reads to define patient ancestry of Asian and White patients analyzed by the TCGA and Hispanic/Latino patients from this study, as compared to reference from the Human Genome Diversity Project (HGDP).
