# Supplementary material
Source: PubMed Central journal article supplement (PMC7489496)
Supplement: NIHMS1582581-supplement-2.pdf [file NIHMS1582581-supplement-2.pdf]

## Supplementary Figure 2

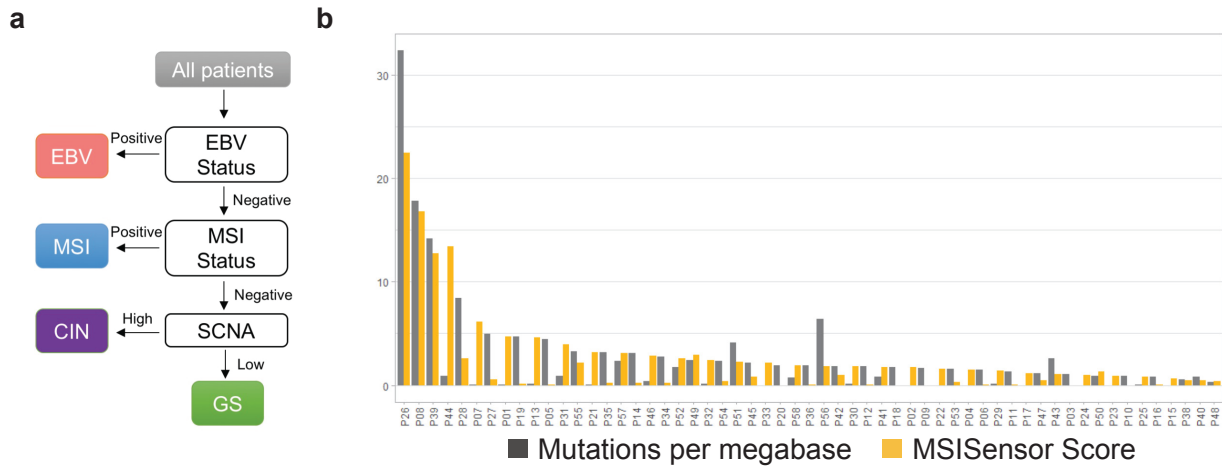

## Supplementary Figure 2

a. The Cancer Genome Atlas algorithm to categorize gastric cancer into four molecular subtypes: Epstein-Barr virus infected (EBV, red), microsatellite instability (MSI, blue), chromosomal instability (CIN, purple), and genomically stable (GS, green). SCNA = somatic copy number alterations.

b. MSIsensor score. Whole-exome sequence data from each Hispanic/Latino cancer sample were analyzed with MSIsensor. Gray bar denotes total mutation burden per megabase. Yellow bar denotes calculated MSIsensor score. Samples with score  $\geq 10$  were considered to be microsatellite unstable.
