# Supplementary material
Source: PubMed Central journal article supplement (PMC7489496)
Supplement: NIHMS1582581-supplement-3.pdf [file NIHMS1582581-supplement-3.pdf]

### Supplementary Figure 3

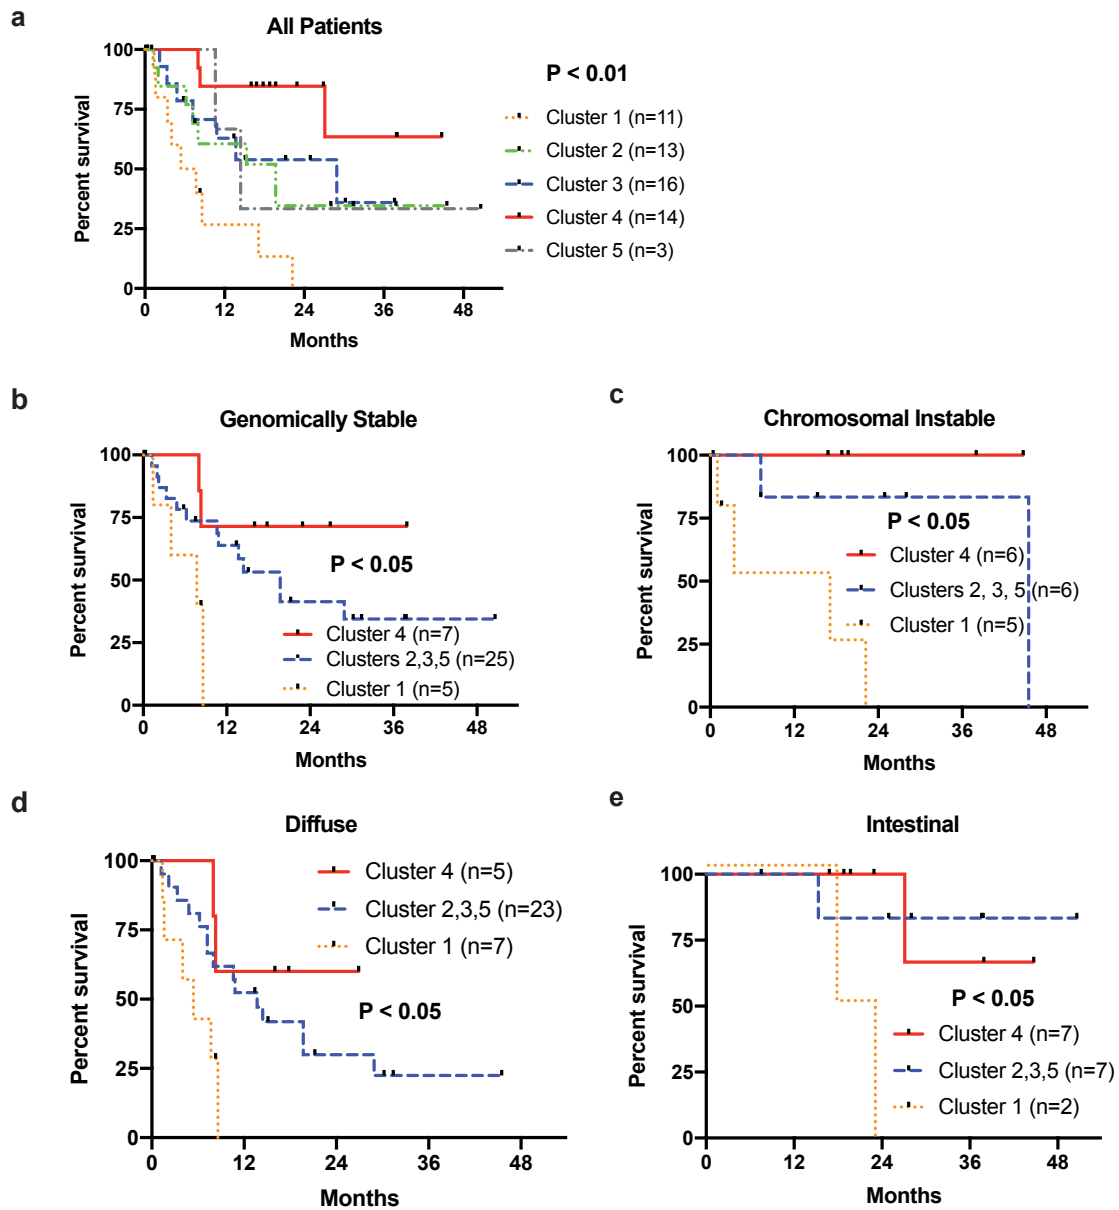

**Supplementary Figure 3.** Subgroup analysis of overall survival for the Hispanic/Latino cohort.

Kaplan-Meier curves comparing:

- a. all patients by individual mRNA clusters,  $P < 0.01$ ,
- b. patients with genomically stable tumors,  $P < 0.05$ ,
- c. patients with chromosomal instable tumors,  $P < 0.05$ ,
- d. patients with diffuse-type tumors,  $P < 0.05$ ,
- e. patients with intestinal-type tumors,  $P < 0.05$ .
