# Supplementary material
Source: PubMed Central journal article supplement (PMC7489496)
Supplement: NIHMS1582581-supplement-4.pdf [file NIHMS1582581-supplement-4.pdf]

## Supplementary Figure 4

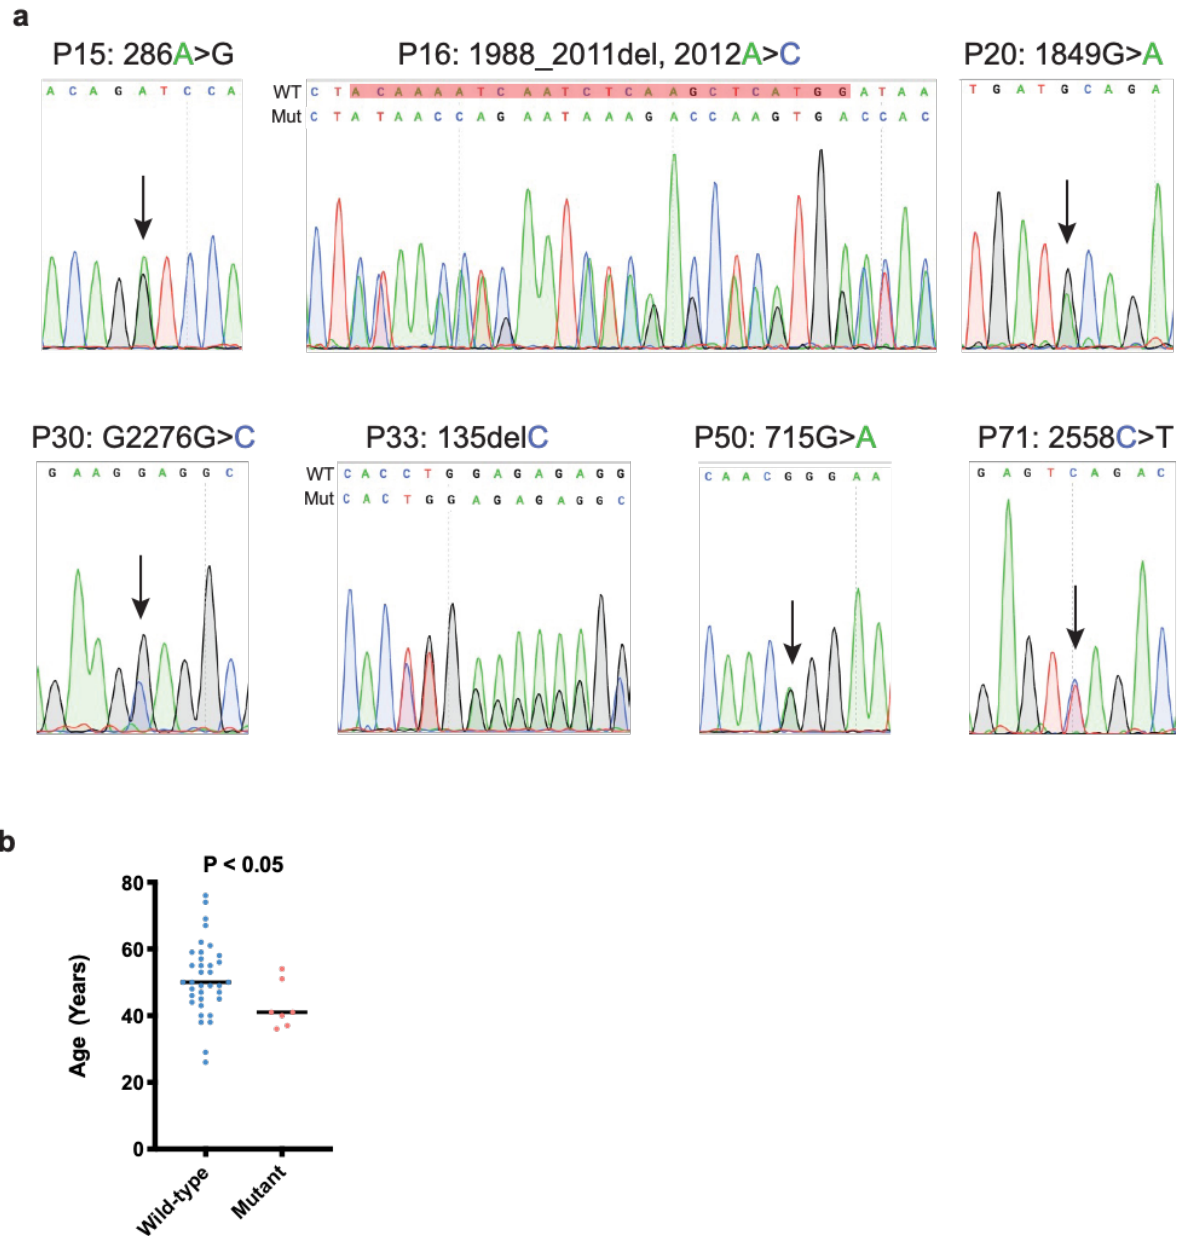

## Supplementary Figure 4

- a. Chromatograms confirming germline *CDH1* mutations identified on whole-exome sequencing.
- b. Age of diffuse-type gastric cancer patients who are wild-type for *CDH1* (blue) or carry germline *CDH1* mutations (red). Bar denotes median.
