# Supplementary material
Source: PubMed Central journal article supplement (PMC7489496)
Supplement: NIHMS1582581-supplement-5.pdf [file NIHMS1582581-supplement-5.pdf]

## Supplementary Figure 5

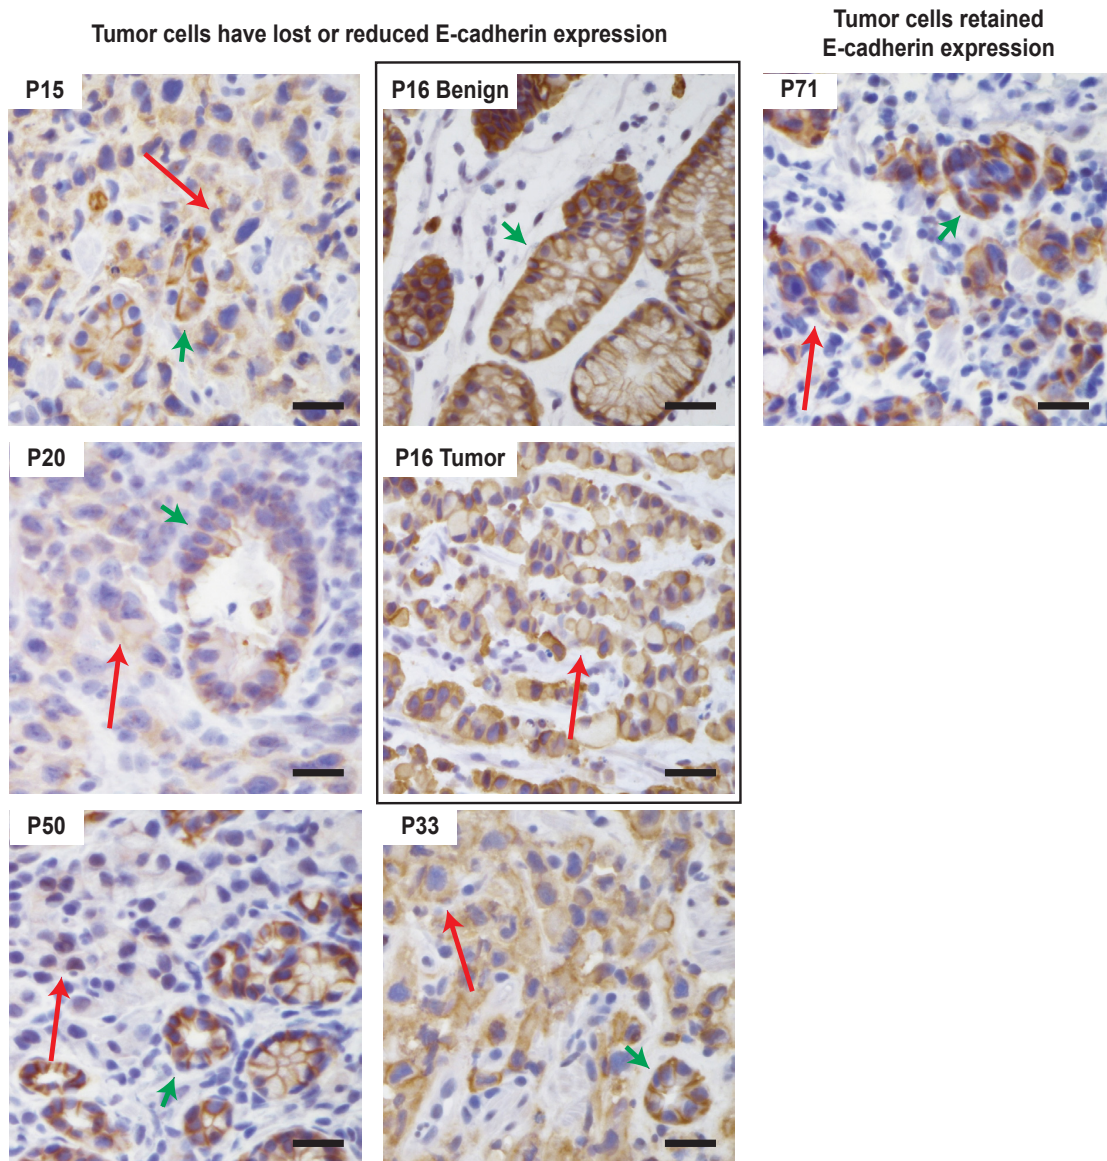

### Supplementary Figure 5.

Immunohistochemistry for E-cadherin in six patients who have germline *CDH1* mutations. Red long arrows denote cancer cells, short green arrows denote normal stomach glands. P: patient. For P16, normal stomach and cancer cells are shown in two separate panels. Scale bar = 50  $\mu\text{m}$ .
