# Supplementary material
Source: PubMed Central journal article supplement (PMC7489496)
Supplement: NIHMS1582581-supplement-6.pdf [file NIHMS1582581-supplement-6.pdf]

## Supplementary Figure 6

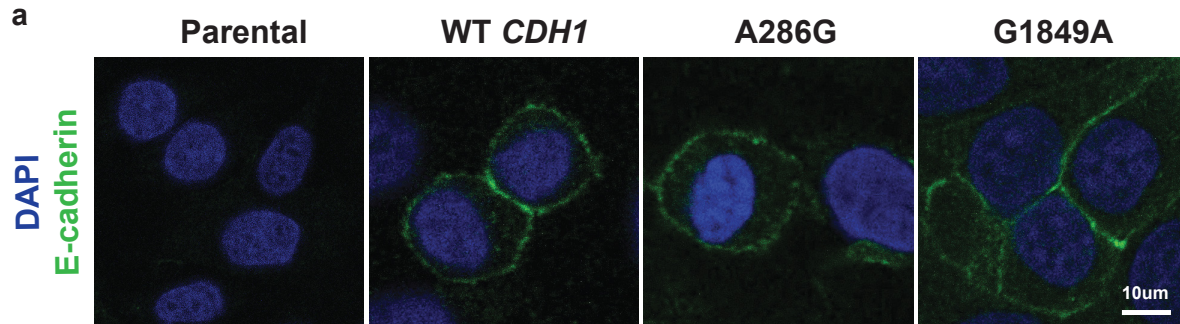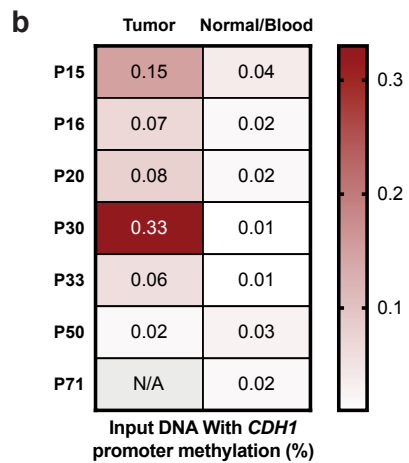

### Supplementary Figure 6.

a. Immunofluorescence staining for E-cadherin in Chinese hamster ovary cells overexpressing wild-type (WT) *CDH1*, A286G, or G1849A variants, all of which have wild-type membranous localization. Scale bar = 10  $\mu$ m.

b. Amount of DNA in which the *CDH1* promoter is methylated.
