# Supplementary material
Source: PubMed Central journal article supplement (PMC7489496)
Supplement: NIHMS1582581-supplement-7.pdf [file NIHMS1582581-supplement-7.pdf]

## **Supplementary Tables**

**Supplementary Table 1:** Clinicopathologic information for each patient sequenced for this study.

**Supplementary Table 2:** Details of *CLDN18-ARHGAP* fusion events.

**Supplementary Table 3:** Clinical and molecular information for each mRNA cluster.

**Supplementary Table 4:** Published reports with rates of *CDH1* germline mutations in non-familial gastric cancer patients.
